# Supplementary material for: A Cross-Sectional Investigation of the Quality of Selected Medicines for Noncommunicable Diseases in Private Community Drug Outlets in Cambodia during 2011–2013
Source: PubMed Central journal article supplement (PMC6838583; doi:10.4269/ajtmh.19-0247), 2019-09-16

**Supplementary Figure 1:** Storage versus Quality of Medicines. White represents the mean storage temperature of the samples during collection in °C and grey represents relative humidity in percent.

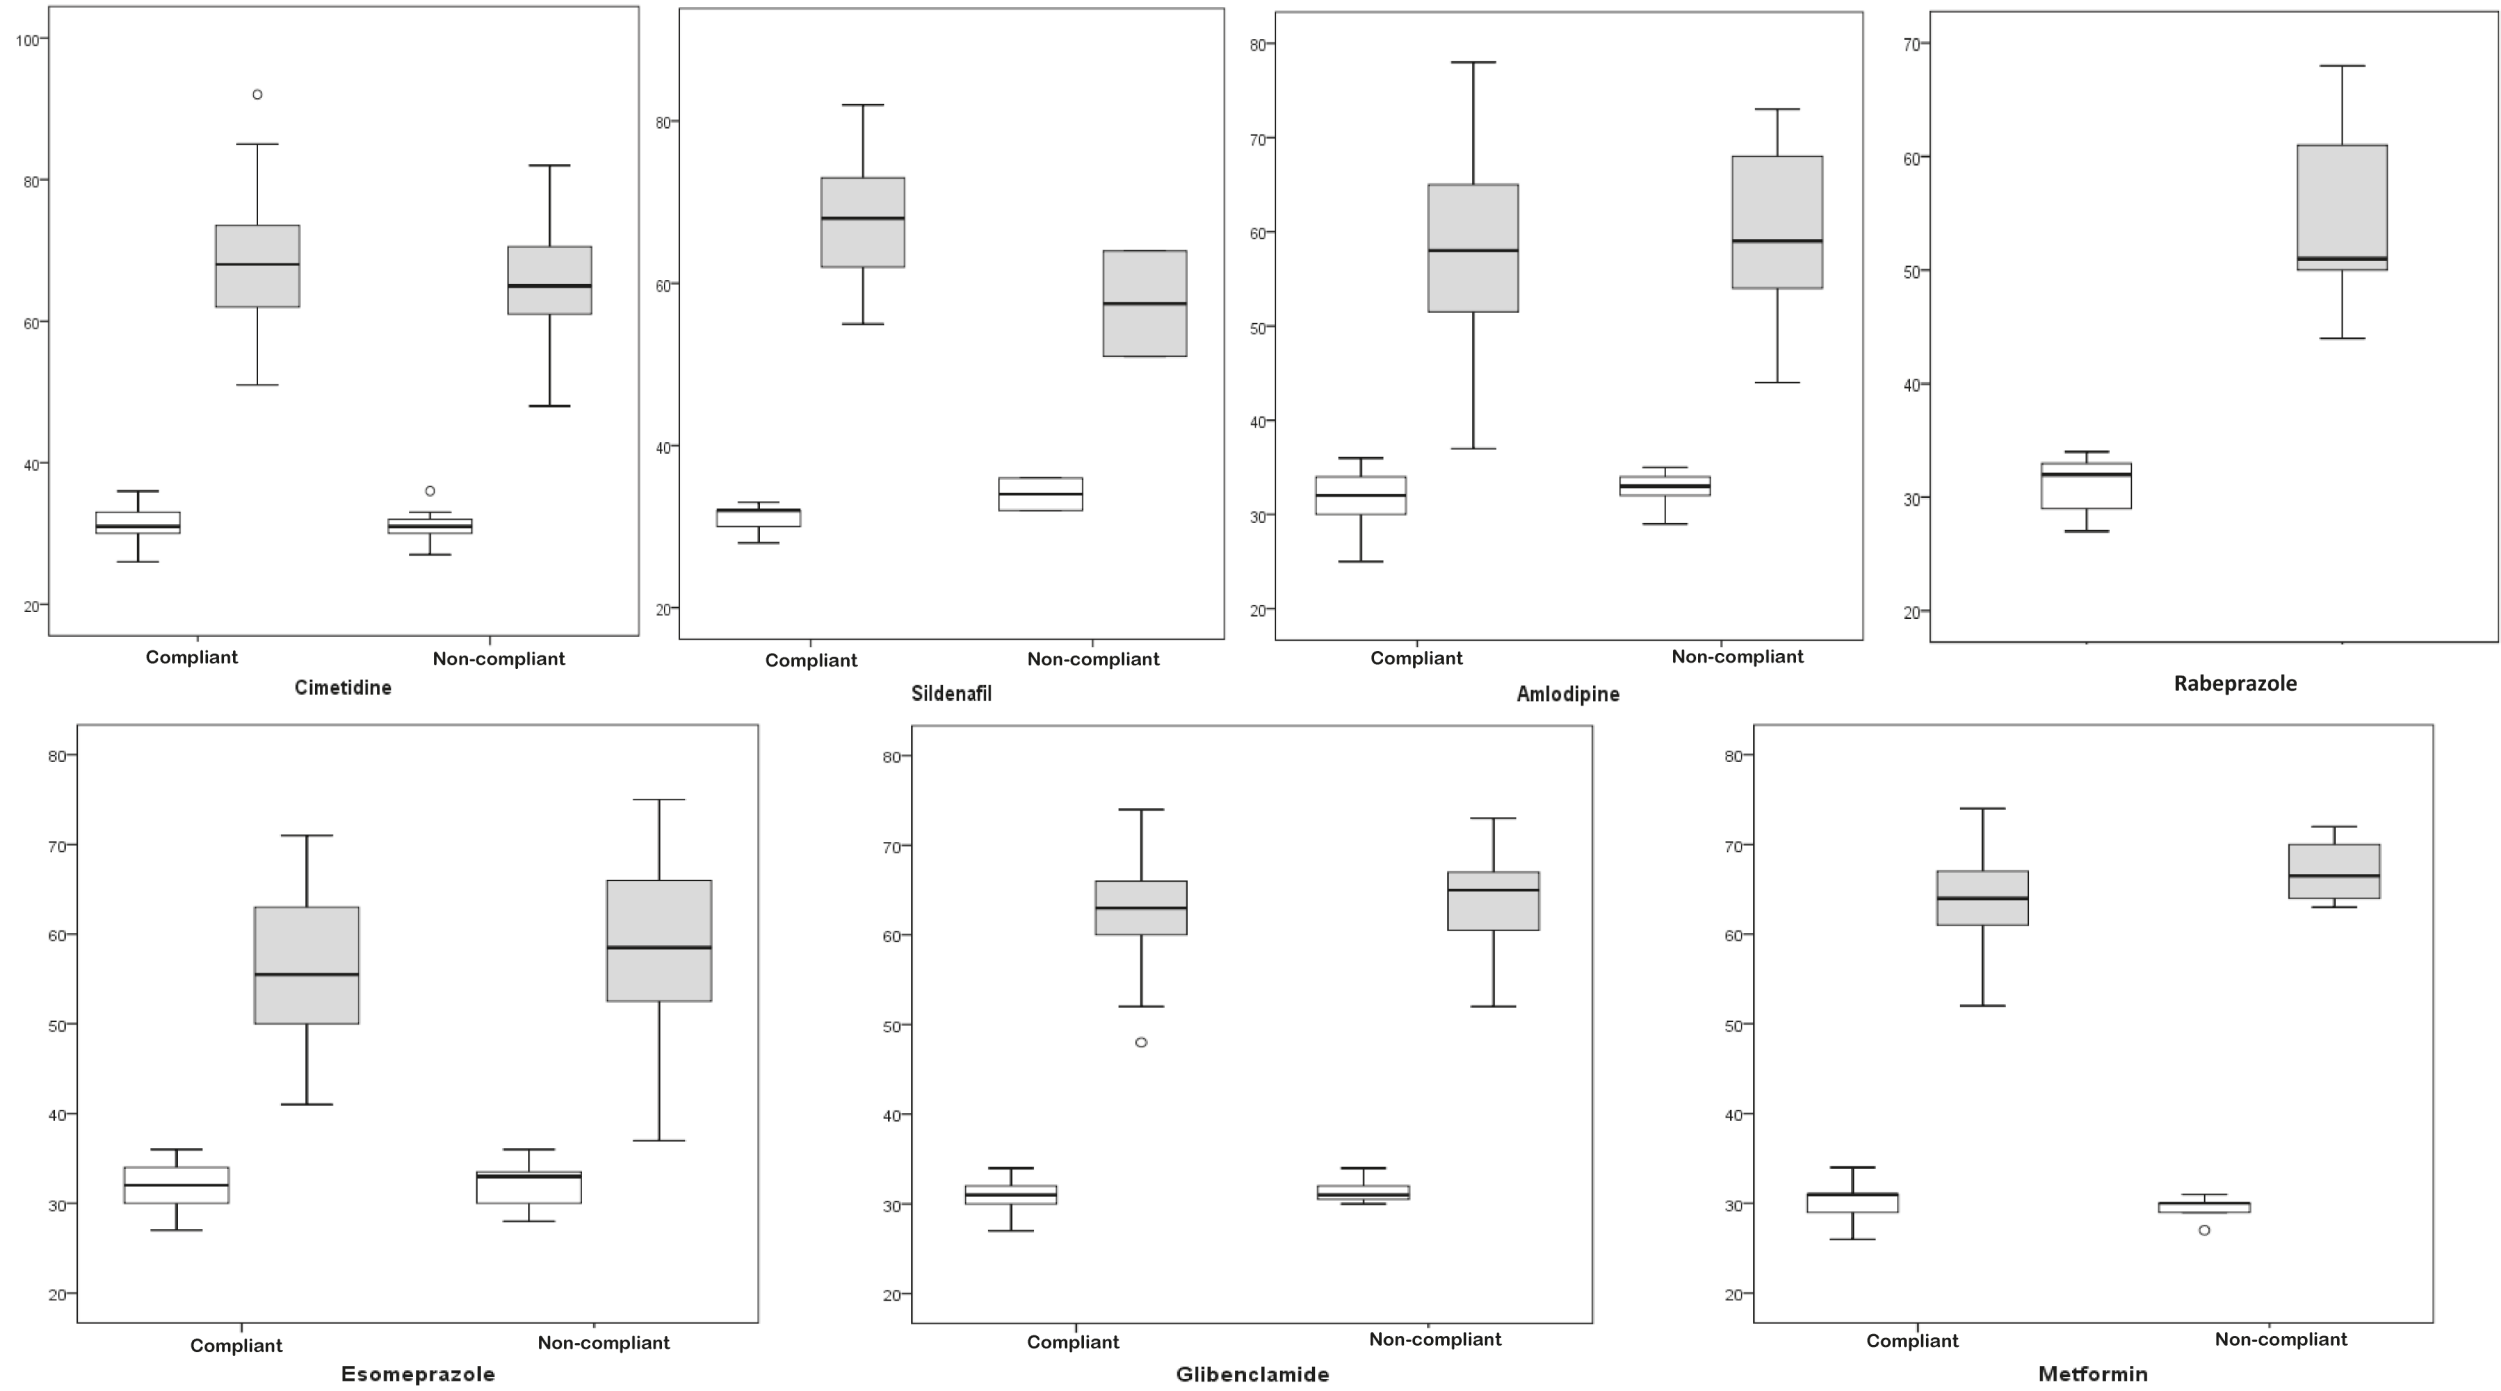

Supplement: tpmd190247.SD1.pdf [file tpmd190247.SD1.pdf]
